# Supplementary material
Source: PubMed Central journal article supplement (PMC9018626)
Supplement: NIHMS1786738-supplement-1786738_SD_ED_Fig_5.pdf [file NIHMS1786738-supplement-1786738_SD_ED_Fig_5.pdf]

Extended Data Fig. 5 b

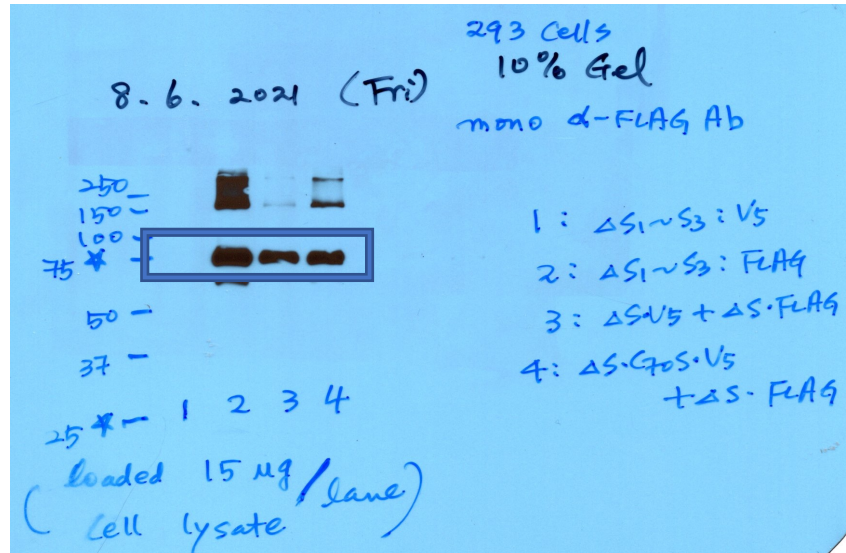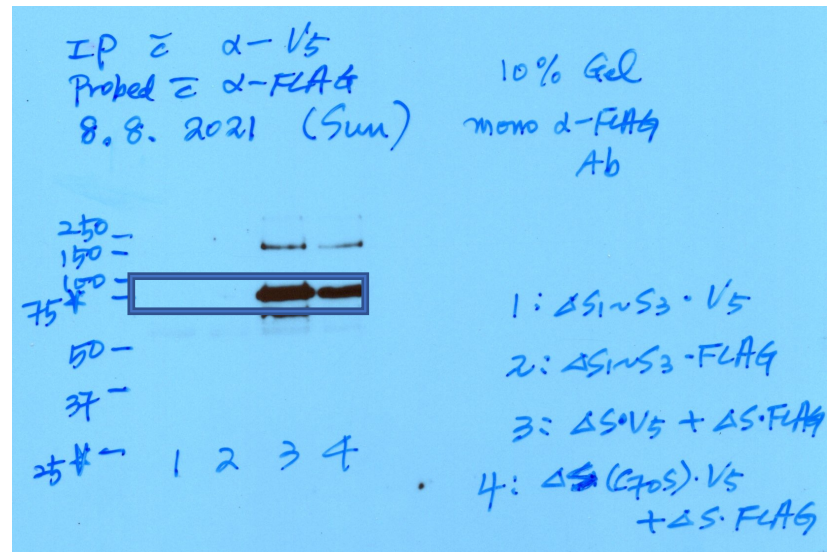

## Extended Data Fig. 5 c

293 cells  
37°C X 1 hr reaction

|               | 6.21.2021 |       | (5ug used)  |
|---------------|-----------|-------|-------------|
|               | cpm       |       | cpm         |
| Mock          | 3677      |       |             |
| delS1-S3      | 112100    | -3677 | 108423      |
| delS1-S3+C70S | 43476     | -3677 | 39799       |
|               |           |       |             |
|               |           |       |             |
|               | 6.24.2021 |       | (50ug Used) |
|               | cpm       |       | cpm         |
| Mock          | 3382      |       |             |
| delS1-S3      | 564940    | -3382 | 561688      |
| delS1-S3+C70S | 384870    | -3382 | 381488      |

To get specific activity:  
118 cpm/pmol

|               | 6.21   | 6.24  |  | pmol/μg/hr |            |
|---------------|--------|-------|--|------------|------------|
|               |        |       |  | Ave        | StDev      |
| delS1-S3      | 183.77 | 95.18 |  | 139.475    | 62.6425897 |
|               |        |       |  |            |            |
| delS1-S3+C70S | 67.36  | 64.66 |  | 66.01      | 1.90918831 |

Extended Data Fig. 5 e

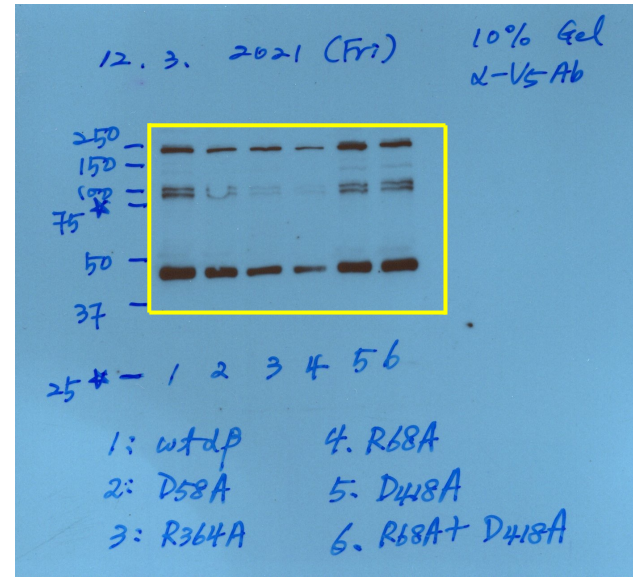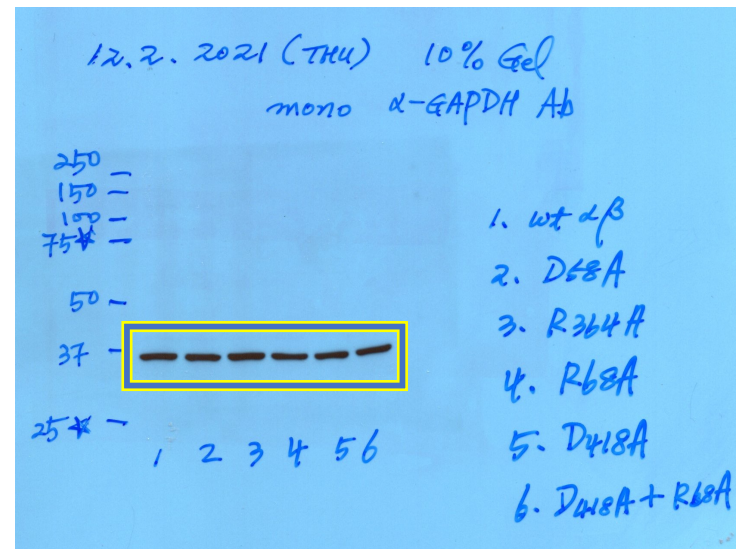

# Extended Data Fig. 5 f

HeLa  $\alpha, \beta$   $-/-$  cells

| 37°C X 2.5 hrs reaction |           |       |             | 37°C X 3 hrs reaction |           |       |             | 37°C X 3 hrs reaction |           |       |             |
|-------------------------|-----------|-------|-------------|-----------------------|-----------|-------|-------------|-----------------------|-----------|-------|-------------|
|                         | 12.1.2021 |       | (50ug used) |                       | 12.2.2021 |       | (50ug used) |                       | 12.3.2021 |       | (50ug used) |
|                         | cpm       |       |             |                       | cpm       |       |             |                       | cpm       |       |             |
| Mock                    | 6277      |       |             | Mock                  | 6515      | -6515 | 0           | Mock                  | 6515      | -6515 | 0           |
| WT                      | 14658     | -6277 | 8381        | WT                    | 16918     | -6515 | 10403       | WT                    | 15533     | -6515 | 9018        |
| R364A                   | 9399      | -6277 | 3122        | R364A                 | 10674     | -6515 | 4159        | R364A                 | 11353     | -6515 | 4838        |
| D58A                    | 8929      | -6277 | 2652        | D58A                  | 10211     | -6515 | 3696        | D58A                  | 9279      | -6515 | 2764        |
| D418+R68                |           |       |             | D418+R68              |           |       |             | D418+R68              |           |       |             |
| A                       | 6868      | -6277 | 591         | A                     | 7492      | -6515 | 977         | A                     | 7996      | -6515 | 1481        |
| R68A                    | 10417     | -6277 | 4140        | R68A                  | 9961      | -6515 | 3446        | R68A                  | 12231     | -6515 | 5716        |
| D418A                   | 9667      | -6277 | 3390        | D418A                 | 12984     | -6515 | 6469        | D418A                 | 11912     | -6515 | 5397        |

For the blank value of 12.2 & 12.3 Data, 6515 cpm (average value from 3 times exp ; 7209, 6110, 6226 cpm) was used.

To get specific activity:  
118 cpm/pmol

pmol/ $\mu$ g/hr

|           | 12.01.2021 | 12.02.2021 | 12.03.2021 | AVE        | STDEV      |
|-----------|------------|------------|------------|------------|------------|
| WT        | 0.57       | 0.59       | 0.51       | 0.55666667 | 0.04163332 |
| R364A     | 0.21       | 0.23       | 0.27       | 0.23666667 | 0.0305505  |
| D58A      | 0.18       | 0.21       | 0.16       | 0.18333333 | 0.02       |
| D418+R68A | 0.04       | 0.06       | 0.08       | 0.06       | 0.02       |
| R68A      | 0.28       | 0.19       | 0.32       | 0.26333333 | 0.07       |
| D418A     | 0.23       | 0.37       | 0.3        | 0.3        | 0.07       |
