# Supplementary material
Source: PubMed Central journal article supplement (PMC9018626)
Supplement: NIHMS1786738-supplement-1786738_SD_ED_Fig_6.pdf [file NIHMS1786738-supplement-1786738_SD_ED_Fig_6.pdf]

Extended Data Fig. 6 a

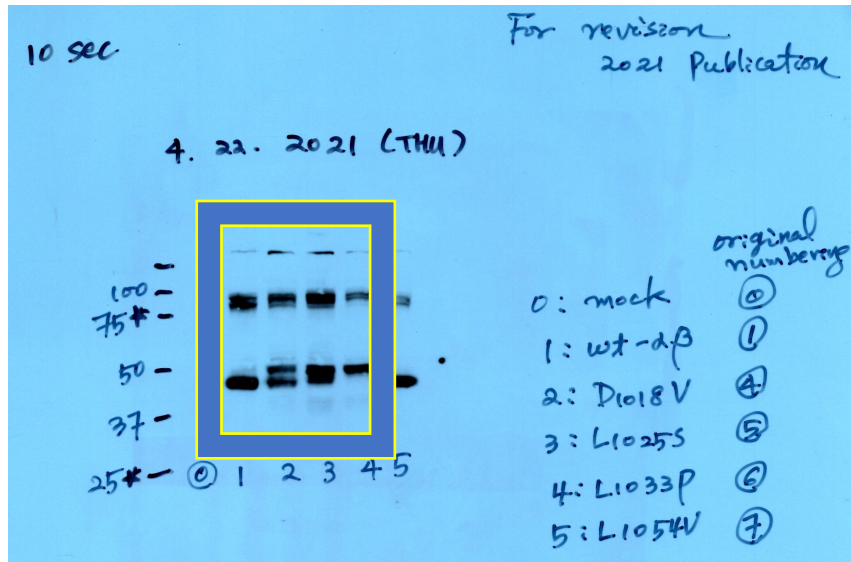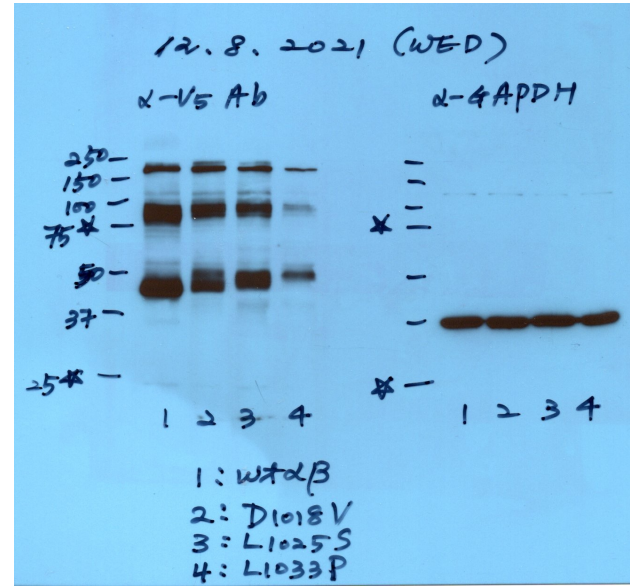

For the GAPDH western blot on 12.8.2021, I used 4.22.2021 cell lysates.

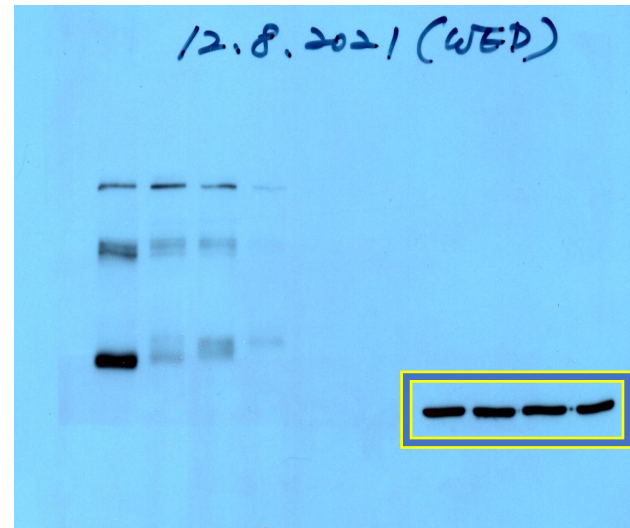

Extended Data Fig. 6 c

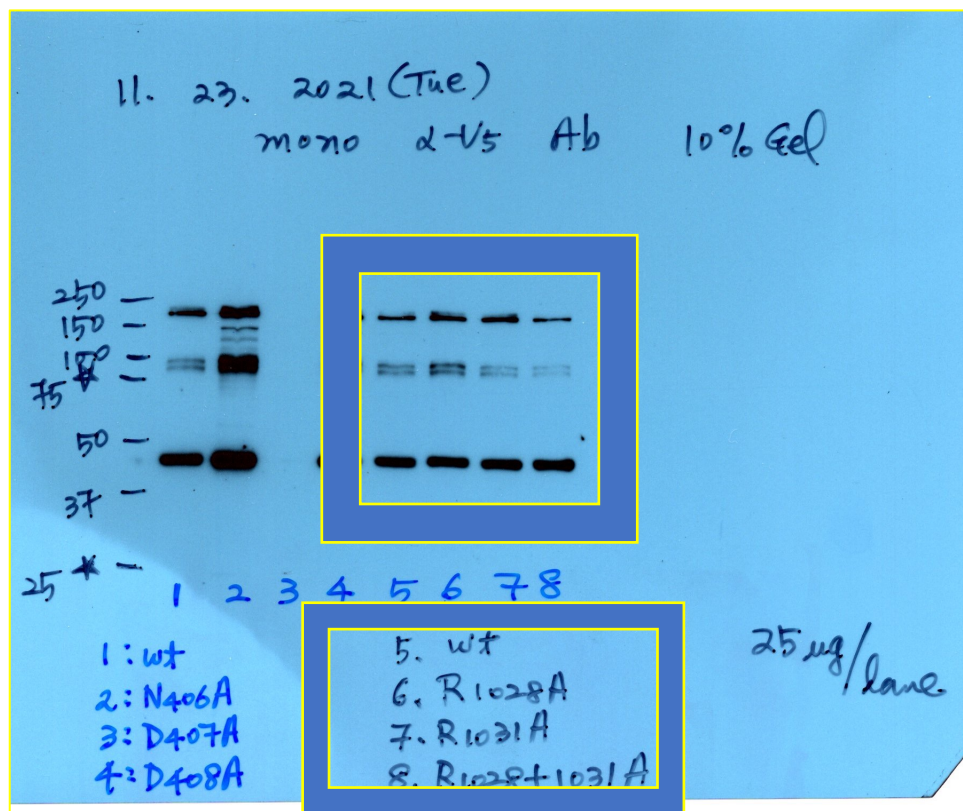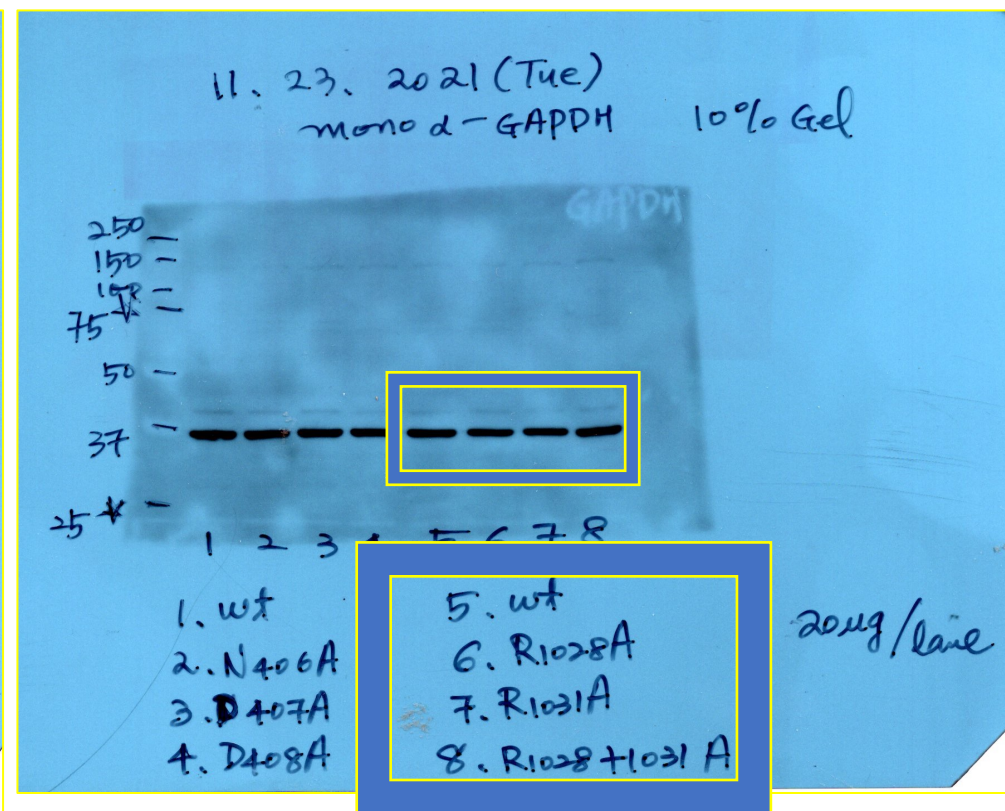

## Extended Data Fig. 6 d

|             | 11.19.2021 | 12.02.2021 | 12.06.2021 | AVE        | STDEV      |
|-------------|------------|------------|------------|------------|------------|
| wt          | 0.43       | 0.56       | 0.44       | 0.47666667 | 0.07234178 |
| R1028A      | 0.29       | 0.41       | 0.4        | 0.36666667 | 0.06658328 |
| R1031A      | 0.37       | 0.36       | 0.39       | 0.37333333 | 0.01527525 |
| R1028+1031A | 0.21       | 0.25       | 0.31       | 0.25666667 | 0.05033223 |

| HeLa-/-     |  |            |       |           |            |
|-------------|--|------------|-------|-----------|------------|
|             |  | 11.19.2021 |       | 75ug used | 2 hrs      |
|             |  | cpm        |       |           |            |
| mock        |  | 6226       |       |           | pmol/ug/hr |
| wt          |  | 13894      | -6226 | 7668      | 0.43       |
| R1028A      |  | 11295      | -6226 | 5069      | 0.29       |
| R1031A      |  | 12854      | -6226 | 6628      | 0.37       |
| R1028+1031A |  | 9906       | -6226 | 3680      | 0.21       |
|             |  |            |       |           |            |
|             |  | 12.02.2021 |       | 50ug used | 3 hrs      |
|             |  | cpm        |       |           |            |
| mock        |  | 6515       |       |           | pmol/ug/hr |
| wt          |  | 16535      | -6515 | 10020     | 0.56       |
| R1028A      |  | 13785      | -6515 | 7270      | 0.41       |
| R1031A      |  | 12814      | -6515 | 6299      | 0.36       |
| R1028+1031A |  | 11018      | -6515 | 4503      | 0.25       |
|             |  |            |       |           |            |
|             |  | 12.06.2021 |       | 75ug used | 2.5 hrs    |
|             |  | cpm        |       |           |            |
| mock        |  | 6515       |       |           | pmol/ug/hr |
| wt          |  | 16215      | -6515 | 9700      | 0.44       |
| R1028A      |  | 15352      | -6515 | 8837      | 0.4        |
| R1031A      |  | 15103      | -6515 | 8588      | 0.39       |
| R1028+1031A |  | 13334      | -6515 | 6819      | 0.31       |

For the mock control value on 12.02.2021 & 12.06.2021,

I used average value of 6515 cpm from 3 exp results  
(7209, 6110, 6226 cpm)
