# Supplementary material
Source: PubMed Central journal article supplement (PMC9018626)
Supplement: NIHMS1786738-supplement-1786738_SD_ED_Fig_7.pdf [file NIHMS1786738-supplement-1786738_SD_ED_Fig_7.pdf]

Extended Data Fig. 7 b

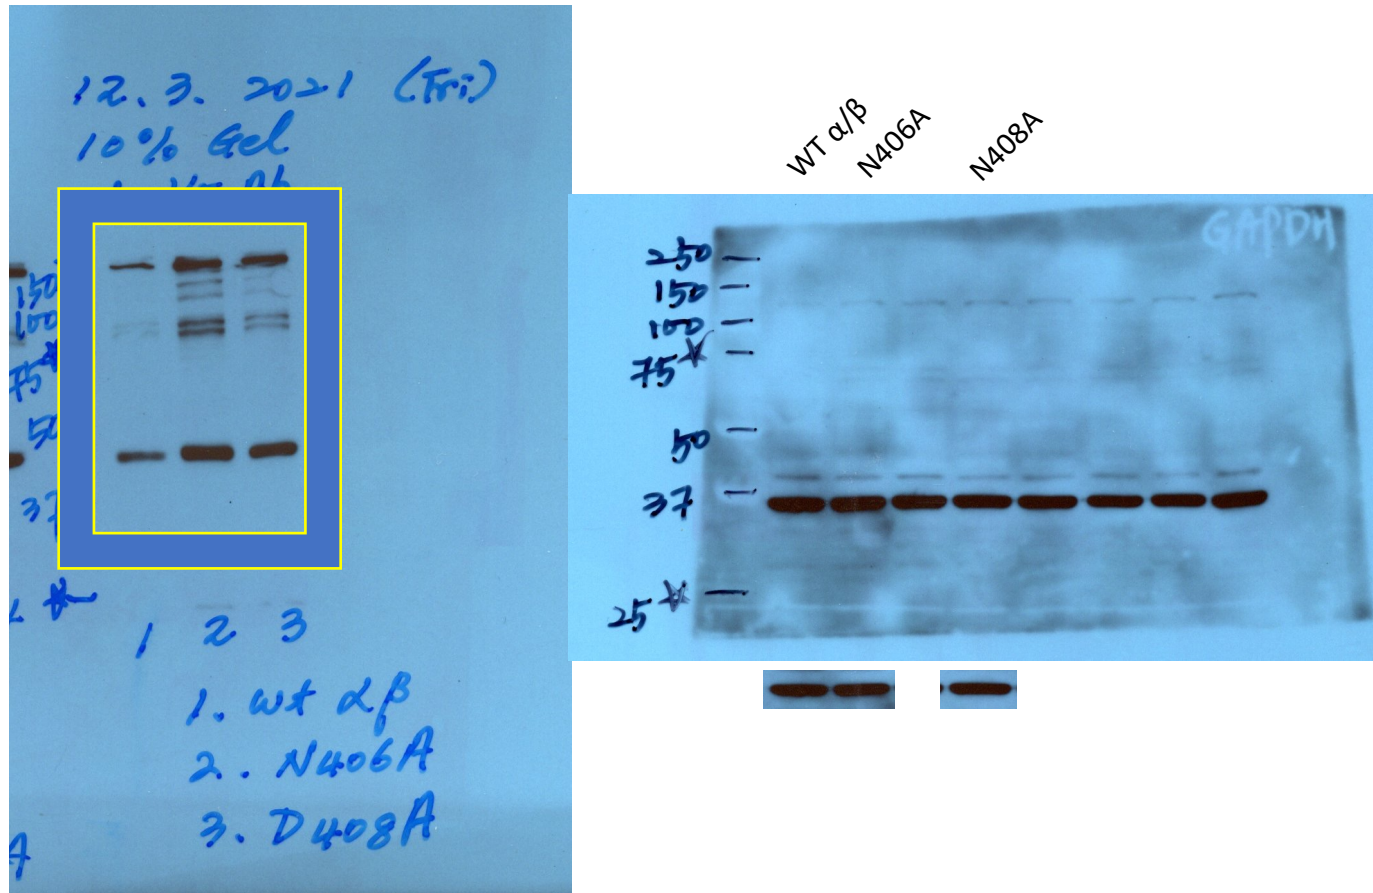

Extended Data Fig. 7 c

|       |            |            |            |       |            |
|-------|------------|------------|------------|-------|------------|
|       | 11.19.2021 |            | 75 ug used | 2 hrs |            |
|       | cpm        |            |            |       |            |
| Mock  | 6226       |            |            |       |            |
| Wt    | 13894      | -6226      | 7668       |       |            |
| N406A | 6179       | -6226      | 0          |       |            |
| D408A | 5526       | -6226      | 0          |       |            |
|       |            |            |            |       |            |
|       | 12.03.2021 |            | 50ug used  | 3 hrs |            |
|       | cpm        |            |            |       |            |
| Mock  | 6515       |            |            |       |            |
| Wt    | 11077      | -6515      | 11077      |       |            |
| N406A | 6857       | -6515      | 342        |       |            |
| D408A | 6176       | -6515      | 0          |       |            |
|       |            |            |            |       |            |
|       |            |            |            |       |            |
|       | 11.19.2021 | 12.03.2021 |            | Ave   | STDEV      |
| WT    | 0.43       | 0.63       |            | 0.53  | 0.14142136 |
| N406A | 0          | 0.02       |            | 0.01  | 0.01414214 |
| D408A | 0          | 0          |            | 0     |            |
|       |            |            |            |       |            |
