# Supplementary material
Source: PubMed Central journal article supplement (PMC9018626)
Supplement: NIHMS1786738-supplement-1786738_SD_Fig_2.pdf [file NIHMS1786738-supplement-1786738_SD_Fig_2.pdf]

Fig. 2d

To get specific activity:  
118 cpm/pmol

pmol/ $\mu$ g/hr

|      | 6.24  | 6.28  |  | Ave   | StDev      |
|------|-------|-------|--|-------|------------|
| Wt   | 17.73 | 12.03 |  | 14.88 | 4.03050865 |
| C70S | 4.9   | 6.79  |  | 5.845 | 1.33643182 |

|      | 6.24.2021   |       |        | 6.28.2021   |       |       |
|------|-------------|-------|--------|-------------|-------|-------|
|      | (50ug Used) |       |        | (50ug Used) |       |       |
|      | cpm         |       |        | cpm         |       |       |
| Mock | 3382        |       |        | Mock        | 3666  |       |
| Wt   | 107973      | -3382 | 104591 | Wt          | 74639 | -3666 |
| C70S | 31675       | -3382 | 28923  | C70S        | 43719 | -3666 |
|      |             |       |        |             |       |       |

Fig. 2g

| HeLa-/- |           |       | 35ug        |         |
|---------|-----------|-------|-------------|---------|
|         | 4.21.2021 |       | 37°C X 3 hr |         |
|         | cpm       |       |             |         |
| mock    | 3849      |       |             |         |
| Wt      | 10439     | -3849 | 6590        | 100%    |
| D1018V  | 4335      | -3849 | 486         | 7.4%wt  |
| L1025S  | 4284      | -3849 | 435         | 6.6%wt  |
| L1033P  | 3883      | -3849 | 34          | 0.5% wt |
|         |           |       |             |         |
|         |           |       | 50ug        |         |
|         | 4.29.2021 |       | 37°C X 2 hr |         |
| mock    | 4160      |       |             |         |
| Wt      | 24744     | -4160 | 20584       | 100%    |
| D1018V  | 3628      | -4160 | 0           | 0       |
| L1025S  | 3516      | -4160 | 0           | 0       |
| L1033P  |           |       | 0           |         |
|         |           |       |             |         |
|         |           |       | 100ug       |         |
|         | 6.16.2021 |       | 37°C X 1 hr |         |
| mock    | 4804      |       |             |         |
| Wt      | 12113     | -4804 | 7309        | 100%    |
| D1018V  | 4974      | -4804 | 170         | 2.3%wt  |
| L1025S  | 4232      | -4804 | 0           | 0       |
| L1033P  | 4250      | -4804 | 0           | 0       |

| Relative Activity |  |           |           |           |            |
|-------------------|--|-----------|-----------|-----------|------------|
|                   |  | 4.21.2021 | 4.29.2021 | 6.16.2021 | Ave        |
| Wt                |  | 100       | 100       | 100       | 100        |
| D1018V            |  | 7.4       | 0         | 2.3       | 3.23333333 |
| L1025S            |  | 6.6       | 0         | 0         | 2.2        |
| L1033P            |  | 0.5       |           | 0         | 0.25       |
