# Supplementary material
Source: PubMed Central journal article supplement (PMC9018626)
Supplement: NIHMS1786738-supplement-1786738_SD_Fig_3.pdf [file NIHMS1786738-supplement-1786738_SD_Fig_3.pdf]

Fig. 3e

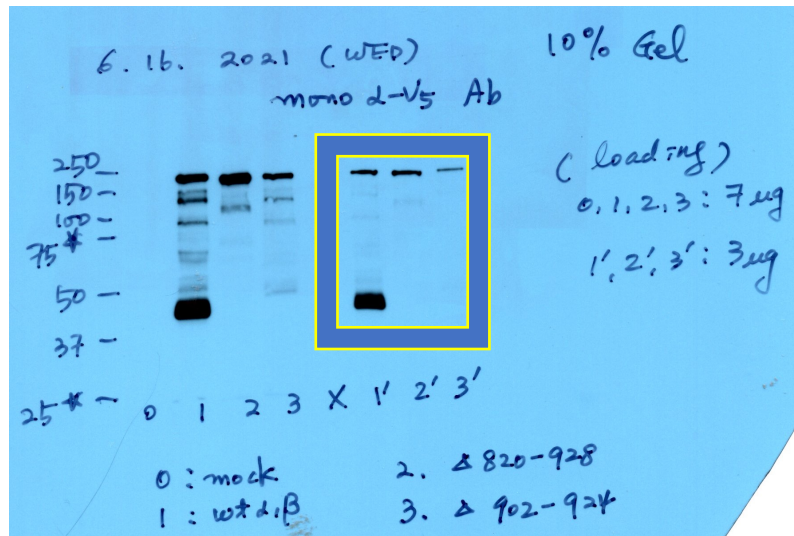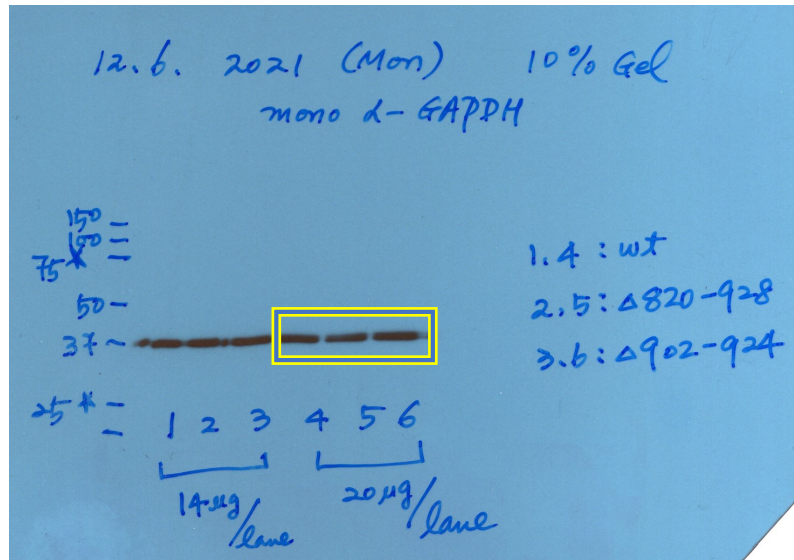

For the GAPDH western blot on 12.6.2021, I used 6.16.2021 cell lysates.

|          | 6.21.2021 |          | (50ug Used) | 1 hr  |            |            |
|----------|-----------|----------|-------------|-------|------------|------------|
|          | cpm       |          |             |       | pmol/ug/hr |            |
| Mock     | 3677      |          |             |       |            |            |
| Wt       | 108171    | -3677    | 104494      |       | 17.71      |            |
| delS3    | 252712    | -3677    | 249035      |       | 42.21      |            |
|          |           |          |             |       |            |            |
|          | 6.24.2021 |          | (50ug Used) | 1 hr  |            |            |
|          | cpm       |          |             |       | pmol/ug/hr |            |
| Mock     | 3382      |          |             |       |            |            |
| Wt       | 107973    | -3382    | 104591      |       | 17.73      |            |
| delS3    | 279078    | -3382    | 275696      |       | 46.73      |            |
|          |           |          |             |       |            |            |
|          | 7.23.2021 |          | (50ug Used) | 1 hr  |            |            |
|          | cpm       |          |             |       | pmol/ug/hr |            |
| Mock     | 2875      | -2873.86 |             |       |            |            |
| Wt       | 107578    | -2875    | 104703      |       | 17.75      |            |
| delS3    | 321419    | -2875    | 318544      |       | 53.99      |            |
| d902-924 | 9595      | -2875    | 6720        |       | 1.14       |            |
|          |           |          |             |       |            |            |
|          | 8.4.2021  | cpm      | (50ug Used) | 1 hr  |            |            |
| Mock     |           | 3237     |             |       |            | pmol/ug/hr |
| Wt       |           |          | 124756      | -3237 | 121519     | 20.6       |
| d902-924 |           | 1st      | 8800        | -3237 | 5563       | 0.94       |
| d902-924 |           | 2nd      | 5255        | -3237 | 2018       | 0.34       |
| d902-924 |           | 3rd      | 4389        | -3237 | 1152       | 0.2        |

|       |            |        | 293 cells |       |       |            |        |
|-------|------------|--------|-----------|-------|-------|------------|--------|
|       |            | Date   | 6.21.     | 6.24  | 7.23. | Ave        | StdDev |
|       | pmol/ug/hr | Wt     | 17.71     | 17.73 | 17.75 | 17.73      | 0.02   |
| delS3 | pmol/ug/hr | del S3 | 42.21     | 46.73 | 54    | 47.6466667 | 5.948  |

|            | 7.23.2021 | 8.4.2021 | 8.4.2021 | 8.4.2021 |  | Ave   | Stdev      |
|------------|-----------|----------|----------|----------|--|-------|------------|
| del902-924 | 1.14      | 0.94     | 0.34     | 0.2      |  | 0.655 | 0.45559485 |
