# Supplementary material
Source: PubMed Central journal article supplement (PMC9018626)
Supplement: NIHMS1786738-supplement-1786738_Sup_Info.pdf [file NIHMS1786738-supplement-1786738_Sup_Info.pdf]

## Supplementary Information

This document contains:

*Supplementary Figure 1*

*Supplementary Table 1*

TM NTE

α1 α2

Homo 1 10 20 30 40 50 60 70

Homo . . . . . MLF KLLQRQTYTCLSHRYGLYVCFGLGVVTVSVAE QFGEVVLWESRDQYHVFDSYRDNVAGKSFQNRRLCLPM

Bos . . . . . MLKLLQRQTYTCLSHRYGLYVCFVGVVTVSVAE QFGEVVLWESRDQYHVFDSYRDNVAGKSFQNRRLCLPM

Mus . . . . . MLKLLQRQTYTCLSHRYGLYVCFVGVVTVSVAE QFGEVVLWESRDQYHVFDSYRDNVAGKSFQNRRLCLPM

Gallus . . . . . MLKLLQRQTYTCLSHRYGPCCLGLGLVLMVSAE QFGEVVLWESRDQYHVFDSYRDNVAGKSFQNRRLCLPM

Danio MLVNVSLKLLQRQTYTCLSHRYGLYLCEGLVLMVSAE QFGEVVLWESRDQYHVFDSYRDNVAGKSFQNRRLCLPM

CR1 S1

β1 α3

Homo 80 90 100 110 120 130 140 150

Homo PIDVYVTVWNGTDLELLELQOVREQMEEEQKAMREILGKNTTEPTKKSEKQIECLLTHCIKVPMLVLDPALPANITL

Bos PIDVYVTVWNGTDLELLELQOVREQMEEEQKAMREILGKNTTEPTKKSEKQIECLLTHCIKVPMLVLDPALPANITL

Mus PIDVYVTVWNGTDLELLELQOVREHMEEQRAMREILGKNTTEPTKKSEKQIECLLTHCIKVPMLVLDPALPANITL

Gallus PIDVYVTVWNGTDVELLELQOVREQMEEEQKIMREILGKNATEPTKKSEKQIECLLTHCIKVPMLVLDPALPANITL

Danio PIDVYVTVWNGTDINLELRLRAVRQRLEEEQKALREILGKNGSEITEAPKGRPECLLTHCIMGPVLDLDPALPANITL

S1

Homo 160 170 180 190 200 210 220

Homo KDLFSLYPSFHSASDIFNVAKFKNPSITNVSVVVFDSITKDVEDAHSGLIKGNSRQITVWRGYLTTDKVLPGLVLMQDLAF

Bos KDLFSLYPSFHSASDVFNVAKFKNPSITNVSVVVFDTTKSVEDAQAGMPKGNRQITVWRGYLTTDKVLPGLVLMQDLAF

Mus KDLPTLYPSFHASDVMFNVAKFKNPSITNVSVVVFDTTKDVEDAHAGPFGGSKQMVWRAYLTTDKVLPGLVLMQDLAF

Gallus KDLLSIHP TLQANNMFFVAKFKNPSITNVTVIVFNDPKDAEAHSGMLKDNSKHIVWRGYLTTDKVLPGLVLMQDLAF

Danio KELPTLSAFASSAKELLOVAKFLHPSSTVALLFHSHTAEKAHADALKDLTHTSISRGYLTTDKVLPGLVLRMHTLAY

S1

Homo 230 240 250 260 270 280 290 300

Homo LSGFPPTFKETNQLKTKLPEENLSKVKLLQLYSEASVALKLNPKDFQELNKQTKKNMTIDGKELTISPAYLWDLIS

Bos LSGFPPTFKETNQLKAKLPEENLSKVKLLQLYSEASVALKLNPKDFQELNKQTKKNMTIDGKELTISPAYLWDLIS

Mus LSGFPPTFKETSQIKTKLPEKLSKTKLLRLYSEASVALKLNPKDFQELNKQTKKNMTIDGKELTISPAYLWDLIS

Gallus LSGFPATFKETNQLRTKLPESLSKVKLLQLYSEASVALQLNPKDFHELKQAKKNMTIDGKELTISPAYLWDLIS

Danio LSGFPASLXETEQLRVQLPAVVTSKTKKLLQLYSEASIALLHLNTAQDITDLTQAKKNLTDGKELTVSSAFLWDLIS

S1 CR2

α4 β2 β3 α5 η1

Homo 310 320 330 340 350 360 370 380

Homo AISKQKQDEDVSASRFEDNEELRYSLSRISERHAPVVRHIFIVTNGQIPSWLNLDNPRVITVTHQDVFVFNLSHLPFTFSS

Bos AISKQKQDEDVSASRFEDNEELRYSLSRISERHAPVVRHIFIVTNGQIPSWLNLDNPRVITVTHQDVFVFNLSHLPFTFSS

Mus AISKQKQDEDVSASRFEDNEELRYSLSRISERHAPVVRHIFIVTNGQIPSWLNLDNPRVITVTHQDVFVFNLSHLPFTFSS

Gallus SVSQSKQDEDVSASRFEDNEELRYSLSRISERHAPVVRHIFIVTNGQIPSWLNLDNPRITVTHQDVFVFNLSHLPFTFSS

Danio AISKQKQDEDVSASRFEDNEELRYSLSRISERHAPVVRHIFIVTNGQIPSWLNLDNPRVSVVTHQDVFVFNLSHLPFTFSS

CR2 N1

α6 β4 β5 η2 β6 β7

Homo 390 400 410 420 430 440 450 460

Homo PAIESHIHRIEGLSQKFYIYLNDDVFMFGKDVWPDFFYSHSKGQKVYLTWPVFNCAEGCPSWIKDGYCDKACNNSACDW

Bos PAIESHIHRIEGLSQKFYIYLNDDVFMFGKDVWPDFFYSHSKGQKVYLTWPVFNCAEGCPSWIKDGYCDKACNNSACDW

Mus PAIESHIHRIEGLSQKFYIYLNDDVFMFGKDVWPDFFYSHSKGQKVYLTWPVFNCAEGCPSWIKDGYCDKACNNSACDW

Gallus PAIESHIHRIEGLSQKFYIYLNDDVFMFGKDVWPDFFYSHSKGQKVYLTWPVFNCAEGCPSWIKDGYCDKACNNSACDW

Danio PAIE THIHRIEGLSQKFYIYLNDDVFMFGKDVWPDFFYSHSKGQKVYLTWPVFNCAEGCPSWIKDGYCDKACNNSACDW

N1 N2

NDD motif

Homo 470 480 490 500 510 520 530

Homo DGGDCSGNSGGSRYIAGGGTGSIGVQPWFAGGCTNSV...SYCNQGCANSWLADKFCDAQCNVLSCGFDAGDCGD

Bos DGGDCSGNSGASRYIAGAGGTGSIGVQPWFAGGCTNSV...SYCNQGCANSWLADKFCDAQCNVLSCGFDAGDCGD

Mus DGGDCSGNTAGNRFVAGGGGTGNIGAQHWFAGGCTNSV...SYCNQGCANSWLADKFCDAQCNVLSCGFDAGDCGD

Gallus DGGDCIGNSGGSRYVAGGAVGGIGNPWFAGGCTNSV...SYCNQGCANSWLADKFCDAQCNVLSCGFDAGDCGD

Danio DGGDCQGS...RF...GGAGGSVIGGQPWFAGGCTNSV...SYCNQGCANSWLADKFCDAQCNVLSAGFDVGDGCD

N2 S2

Homo 540 550 560 570 580 590 600 610

Homo HFHELYKVLILPNQTHYIIPKCECLPYFSFAEVAKRGVGAYSDNPPIIRHASANKKWTIHLIMHSGMNAITIHFNLT

Bos HFHELYKVLILPNQTHYVVPKCECLPYFSFAEIAKKGIEGAYSDNPPIIRHASANKKWTIHLIMHSGMNAITIHFNLT

Mus HFHELYKVLILPNQTHYVVPKCELYFSFSEIARKGIEGAYSDNPPIIRHASANKKWTIHLIMHSGMNAITIHFNLT

Gallus HFHEMYKVLILQNLQTYVVPKCECLPYFSFSEIARKGIEGAYSDNPPIIRHASANKKWTIHLIMHSGMNAITIHFNLT

Danio NLNLQHRIVLRNQLTLVLPQELRPFYFSFGLANRVSAHVAHQVLRHTSVANKKWTIHLILLLPGHNAITIHFNLT

S2

Homo 620 630 640 650 660 670 680 690

Homo FQNINDEEFKMQITVEVDTRCEPKLN...STAQKGYENLVSPITLPEAEILFEDIPKERRFPKFRHDVNSTRRAGQEEV

Bos LQGNDEEFKIQIVVEVDTRCEPKRN...STQKAYQSSMSTTLPEAEILFEDIPKERRFPKFRHDVNSTRRAGQEEV

Mus LQANDEEFKIQIIVVEVDTRCEPKLN...STQKAYESLVSPVTPPEQADVPFEDVPEKERRFPKIRRHVDNATGRFQEEV

Gallus FLNKNDEEFKMQVAVEVDTRCEPKLN...TSMQKSDTDFKTTT...VPEAEMLFEDIPKERRFPKFRHDVNSTRRAGQEEV

Danio FQSTDHHDFIMTFVSVDTRCEPKNS...STPVRDKIEEPKPTVATPEPEVPEFAVPEKERRFPKFRHDVNSTRRAGQEEV

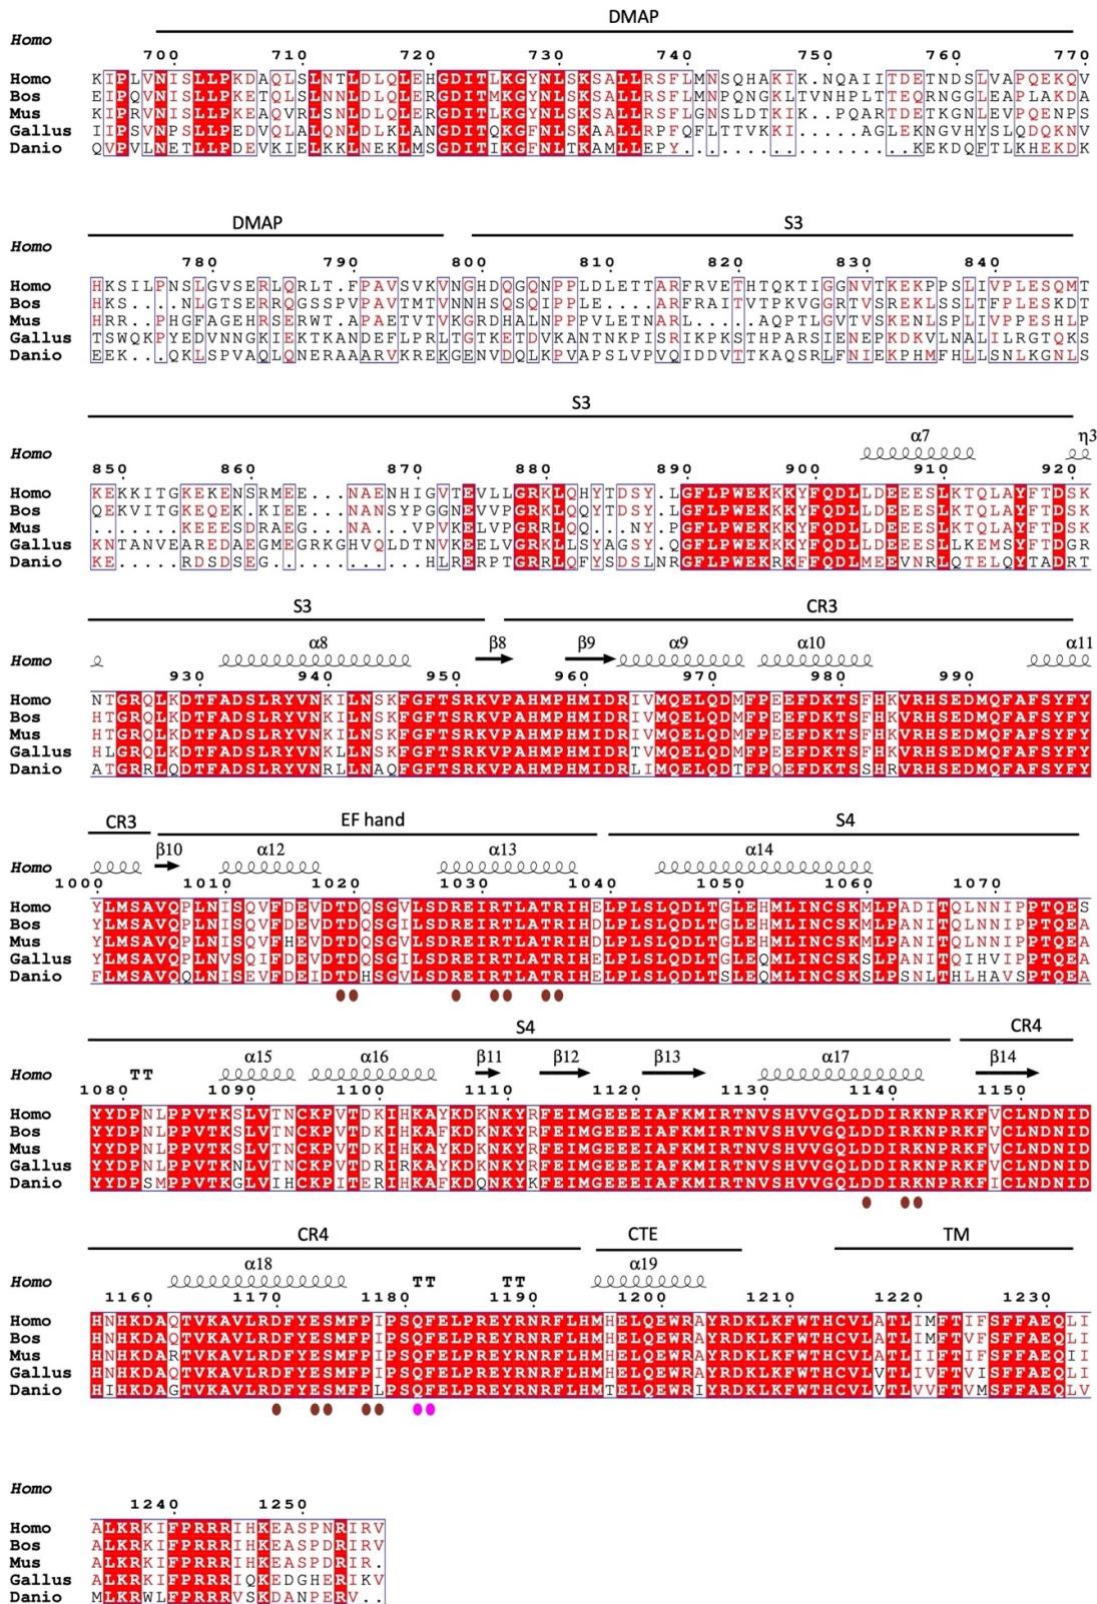

## Supplementary Table 1. Primers used in this study

|                   |     |                                                          |
|-------------------|-----|----------------------------------------------------------|
| <b>Fig 2c.</b>    |     |                                                          |
| C70S              | for | GGAAAGTCCTTTCAGAATCGGCTTAGTCTGCCCATGCCGATTGAC            |
| <b>Fig 2g.</b>    |     |                                                          |
| D1018V            | For | CTCAAGTCTTTGATGAAGTTGTTACAGATCAATCTGGTGTC                |
| L1025S            | For | GATACAGATCAATCTGGTGTCCTCGTCTGACAGAGAAATCCG               |
| L1033P            | For | GACAGAGAAATCCGAACACCGGCTACCAGAATTCACGAAC                 |
| <b>Fig 3e.</b>    |     |                                                          |
| Del S3            | For | GAGACCACAGCAAGATTTAGAGTGGAAAGATACATTTGCAGATTCCTC         |
| Del 902-924       | For | CCATGGGAGAAAAAAGTATTTCAAAGGCACTAAAAGATACATTTGCAGATTC     |
| <b>Supp 6 e,f</b> |     |                                                          |
| D58A              | For | GTTTTGTTTGATTCTATAGAGCCAATATTGCTGGAAAGTCC                |
| R364A             | For | GGCTGAACCTTGACAATCTGCAGTGACAATAGTAACACACC                |
| R68A              | For | GGAAAGTCCTTTCAGAATGCGCTTTGTCTGCCCATGCCG                  |
| D418A             | For | GGATGTCTGGCCAGATGCTTTTTACAGTCACTCC                       |
| D418A + R68A      |     | Used R68A ;        Template<br>Used D418A;       primers |
| <b>Supp 7c.</b>   |     |                                                          |
| R1028A            | For | GGTGTCTTGTCTGACGCAGAAATCCGAACACTGG                       |
| R1031A            | For | GTCTGACAGAGAAATCGCAACACTGGCTACCAGAATTC                   |
| R1028A+R1031A     | For | CAATCTGGTGTCTTGTCTGACGCGGAAATCGCCACACTGGCTACCAGAATTC     |
| <b>Supp 8b.</b>   |     |                                                          |
| N406A             | For | CAGAAGTTTATTTACCTAGCTGATGATGTCATGTTTGG                   |
| D408A             | For | GTTTATTTACCTAAATGATGCTGTCATGTTTGGGAAGG                   |
